# Supplementary material for: The Isoflavone Puerarin Exerts Anti-Tumor Activitiy in Pancreatic Ductal Adenocarcinoma by Suppressing Akt/mTOR Activity
Source: Research Square preprint supplement (doi:10.21203/rs.3.rs-152446/v1), 2021-01-25
Supplement: Supplementary file 1 [file dcfab7e5ae1fdb8e0ea3c8d3.docx]

| **Reagent or Resource** | **Source** | **Identifier** |
| --- | --- | --- |
| Rabbit polyclonal anti-caspase8 | Proteintech | Cat# 13423-1-AP |
| Rabbit polyclonal anti-Bcl-2 | Proteintech | Cat# 12789-1-AP |
| Rabbit polyclonal anti-Bax | Proteintech | Cat# 50599-2-Ig |
| Rabbit monoclonal anti-α-SMA | ABclonal | Cat# A17910 |
| Rabbit monoclonal anti-E-Cadherin | Abcam | Cat# ab231303 |
| Rabbit polyclonal anti-Vimentin | Abcam | Cat# ab45939 |
| Rabbit monoclonal anti-c-Myc | Abcam | Cat# ab32072 |
| Rabbit polyclonal anti-Snail1 | Proteintech | Cat# 13099-1-AP |
| Rabbit monoclonal anti-mTOR | Abcam | Cat# ab32028 |
| Rabbit polyclonal anti-p-mTOR | Abcam | Cat# ab131538 |
| Rabbit monoclonal anti-Ki67 | Abcam | Cat# ab16667 |
| Rabbit polyclonal anti-GAPDH  Rabbit polyclonal anti-p-AKT  Rabbit polyclonal anti-AKT  Rabbit polyclonal anti-GLUT1  Rabbit polyclonal anti-SLUG  Rabbit monoclonal anti-HIF1-α  Rabbit polyclonal anti-Cytochrome C | Proteintech  Abcam  Abcam  Affinity  Abcam  Abcam  Abcam | Cat# 10494-1-AP  Cat# ab38449  Cat# ab8805  Cat# AF0173  Cat# 27568  Cat# ab1  Cat# ab90529 |

**Supplemental Table 1. Primary antibodies in this study**
